# Supplementary material for: Analysis of localized excitons in strained monolayer WSe2 by first principles calculations
Source: Royal Society of Chemistry journal article supplement (doi:10.1039/d2nr02746a), 2022-01-01
Supplement: d2nr02746a1.pdf [file d2nr02746a1.pdf]

## Supplementary Information

# Analysis of Localized Excitons in Strained Monolayer WSe<sub>2</sub> by First Principles Calculations

*Jie Jiang<sup>a</sup> and Ruth Pachter<sup>a\*</sup>*

<sup>a</sup>Air Force Research Laboratory, Materials and Manufacturing Directorate,  
Wright-Patterson Air Force Base, Ohio 45433, USA

\*Corresponding author: [ruth.pachter@us.af.mil](mailto:ruth.pachter@us.af.mil); Tel: 1-937-255-9689

**Table S1.** Exciton energies (in eV) for pristine and wrinkled monolayer WSe<sub>2</sub> by nano-indentation (R=1.5 nm and H= 0.1 nm).

| Energy   | Dark exciton | $X_A$ | $X_A^{2s}$ | $X_B$ | $X_B^{2s}$ | $X_C$ |
|----------|--------------|-------|------------|-------|------------|-------|
| Pristine | 1.53         | 1.58  | 1.90       | 2.02  | 2.37       | 2.82  |
| Wrinkle  | 1.15         | 1.30  | 1.59       | 1.82  | 2.39       | 2.67  |

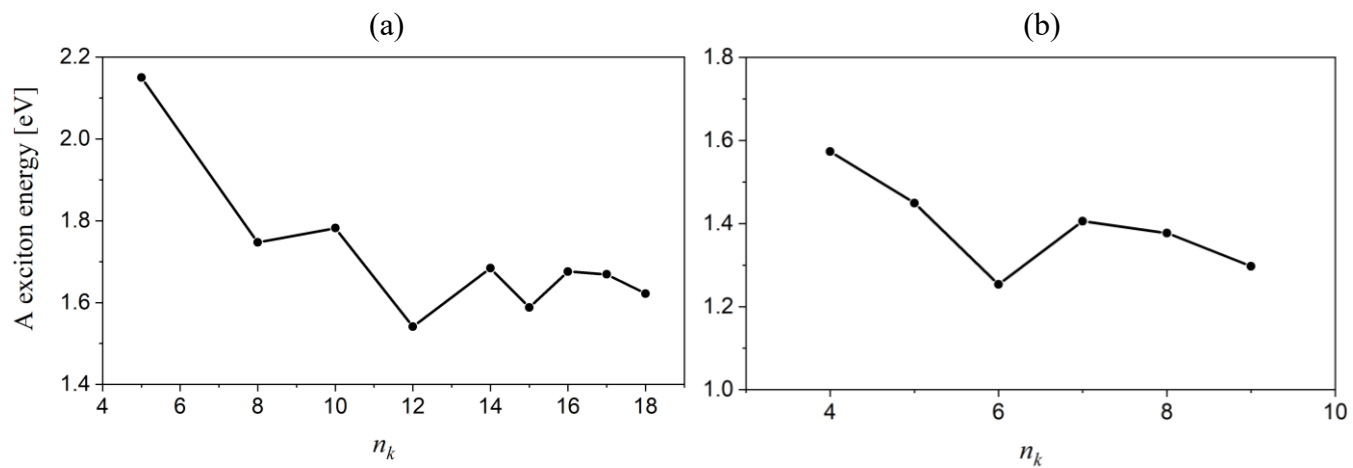

**Fig. S1.** Calculated A exciton energy (GW-BSE) vs.  $n_k$  for (a)  $n_k \times n_k \times 1$  k sampling for pristine monolayer WSe<sub>2</sub>, and (b)  $1 \times n_k \times 1$  k sampling in the GW-BSE for the nano-indented wrinkle (R=1.5 nm and H= 0.1 nm).

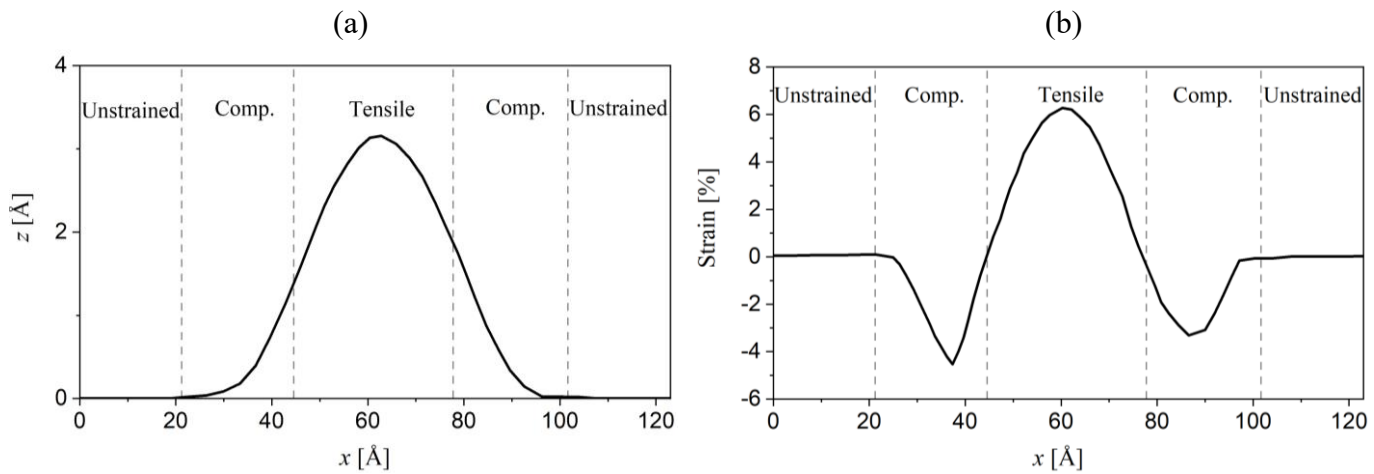

**Fig. S2.** (a) Height and (b) strain vs.  $x$  coordinate in the nano-indented WSe<sub>2</sub> monolayer;  $R = 5$  nm and  $H = 0.31$  nm.

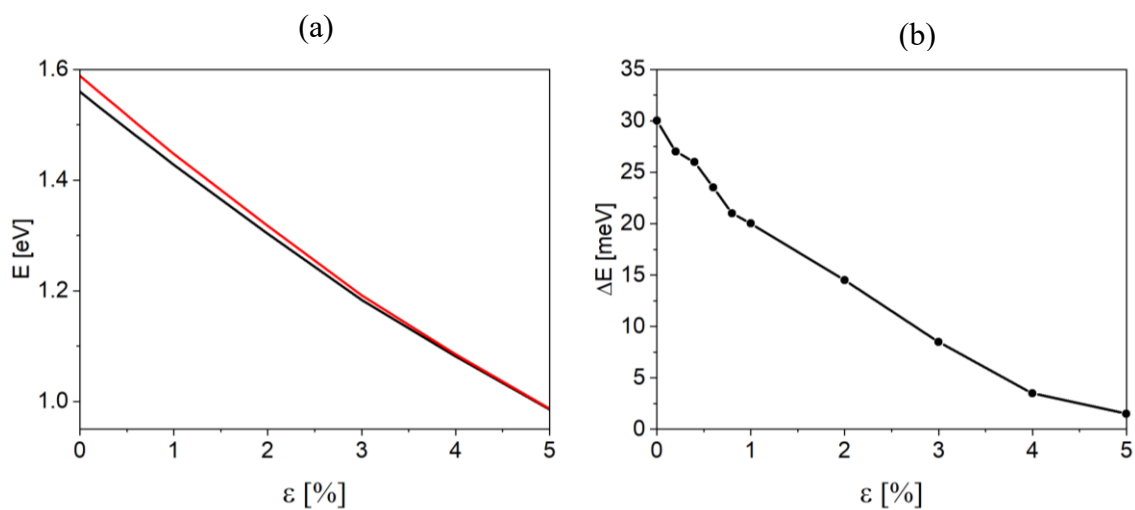

**Fig. S3.** (a) Exciton energy vs. biaxial strain for the lowest energy dark exciton (black line) and A exciton (red line). (b) Energy difference between the A exciton and the lowest energy dark exciton vs. strain.

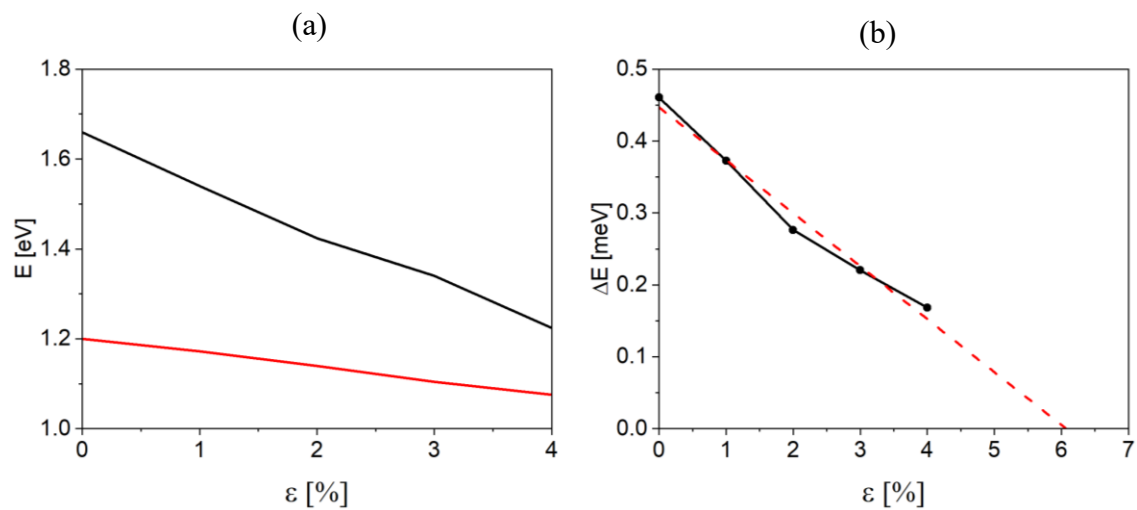

**Fig. S4.** (a) Exciton energy vs. biaxial strain for the A exciton (black) and the lowest SV exciton (red). (b) Energy difference between the A exciton and the lowest SV exciton vs. strain. Dots indicate the calculated data and the dashed line is a fit.
